# Supplementary material
Source: PubMed Central journal article supplement (PMC3030375)
Supplement: supp_M110.147991_figure1.pdf [file supp_M110.147991_figure1.pdf]

# Supplemental Figure 1.

## Hetero-oligomer

|                          |                |                                    |                     |
|--------------------------|----------------|------------------------------------|---------------------|
| GPPs(C <sub>10</sub> )   | Heterotetramer | <i>Mentha piperita</i>             | 3KRC,3KRF,3KRO,3KRP |
| HexPPs(C <sub>30</sub> ) | Heterodimer    | <i>Micrococcus luteus</i> B-P 26   | 3AQB,3AQC           |
| HepPPs(C <sub>35</sub> ) | Heterodimer    | <i>Bacillus subtilis</i>           | -                   |
|                          |                | <i>Bacillus stearothermophilus</i> | -                   |
| SPPs(C <sub>45</sub> )   | Heterotetramer | <i>Mus musculus</i>                | -                   |
|                          |                | <i>Homo sapience</i>               | -                   |
| DPPs(C <sub>50</sub> )   | Heterotetramer | <i>Schizosaccharomyces pombe</i>   | -                   |
|                          |                | <i>Homo sapience</i>               | -                   |

## Homo-oligomer

|                          |              |                                  |                                   |
|--------------------------|--------------|----------------------------------|-----------------------------------|
| GPPs(C <sub>10</sub> )   | Homodimer    | <i>Abies grandis</i>             | -                                 |
| FPPs(C <sub>15</sub> )   | Homodimer    | <i>Esherichia coli</i>           | 1RQI                              |
|                          |              | <i>Gallus gallus</i>             | 1FPS,1UBW,1UBX,1UBY               |
|                          |              | <i>Homo sapience</i>             | 1ZW5                              |
|                          |              | <i>Trypanosoma cruzi</i>         | 1YHM                              |
| GGPPs(C <sub>20</sub> )  | Homodimer    | <i>Saccharomyces cerevisiae</i>  | 2DH4,2E8T,2E8U,2E8V,<br>2E8X,2E90 |
|                          |              | <i>Sinapis alba</i>              | 2J1P                              |
|                          |              | <i>Pantoea ananatis</i>          | -                                 |
|                          |              | <i>Pyrococcus horikoshii</i> Ot3 | 1WY0                              |
|                          |              | <i>Thermus thermophilus</i>      | 1WMW                              |
| HexPPs(C <sub>30</sub> ) | Homo-hexamer | <i>Homo sapience</i>             | 2Q80                              |
|                          | Homodimer    | <i>Sulfolobus solfataricus</i>   | 2AZJ                              |
| OPPs(C <sub>40</sub> )   | Homodimer    | <i>Thermotoga maritima</i>       | 1V4E                              |
| SPPs(C <sub>45</sub> )   | Homodimer    | <i>Micrococcus luteus</i>        | -                                 |
|                          |              | <i>Arabidopsis thaliana</i>      | -                                 |
| DPPs(C <sub>50</sub> )   | Homodimer    | <i>Agrobacterium tumefaciens</i> | -                                 |
