# Supplementary material
Source: PubMed Central journal article supplement (PMC3030375)
Supplement: supp_M110.147991_Supplegends.pdf [file supp_M110.147991_Supplegends.pdf]

## SUPPLEMENTAL INFORMATION

### CRYSTAL STRUCTURE OF HETERODIMERIC HEXAPRENYL DIPHOSPHATE SYNTHASE FROM *MICROCOCCUS LUTEUS* B-P 26 REVEALS THAT THE SMALL SUBUNIT IS DIRECTLY INVOLVED IN THE PRODUCT CHAIN LENGTH REGULATION

Daisuke Sasaki<sup>§</sup>, Masahiro Fujihashi<sup>§</sup>, Naomi Okuyama<sup>§</sup>, Yukiko Kobayashi<sup>§</sup>, Motoyoshi Noike<sup>@</sup>, Tanetoshi Koyama<sup>@</sup>, and Kunio Miki<sup>§</sup>

<sup>§</sup> Department of Chemistry, Graduate School of Science, Kyoto University, Sakyo-ku, Kyoto, Kyoto 606-8502, Japan

<sup>@</sup> Institute of Multidisciplinary Research for Advanced Materials, Tohoku University, Aoba-ku, Sendai, Miyagi 980-8577, Japan

#### Supplemental Figure Captions

Supplemental Figure 1. Characterized homo- and heterooligomeric *trans*-prenyltransferases with their sources and PDB codes if available. These include heterotetrameric GPPs from *Mentha piperita* (1-3), heterodimeric HexPPs from *Micrococcus luteus* B-P 26 (4-9), heterodimeric HepPPs from *Bacillus subtilis* (4,10-14) and *Bacillus stearothermophilus* (15,16), heterotetrameric SPPs from *Mus musculus* (17) and *Homo sapiens* (17), and heterotetrameric DPPs from *Schizosaccharomyces pombe* (18) and *Homo sapiens* (17), homodimeric GPPs from *Abies grandis* (19), homodimeric FPPs from *E. coli* (20), *Gallus gallus* (21,22), *Homo sapiens* (23,24) and *Trypanosoma cruzi* (25), homodimeric GGPPs from *Saccharomyces cerevisiae* (26), *Sinapis alba* (27), *Pantoea ananatis* (28), *Pyrococcus horikoshii* Ot3 and *Thermus thermophilus* (29), homohexameric GGPPs from *Homo sapiens* (30,31), homodimeric HexPPs from *Sulfolobus solfataricus* (32,33), homodimeric OPPs from *Thermotoga maritima* (34), homodimeric SPPs from *Micrococcus luteus* (35) and *Arabidopsis thaliana* (36), and homodimeric DPPs from *Agrobacterium tumefaciens* (37).

Supplemental Figure 2. Arrangement of the two heterodimers ((HexA-HexB) and (HexA'-HexB')) in an asymmetric unit. (A) Front view of the heterodimers (*cylindrical helices*). Two HexB molecules, the large subunits of the two heterodimers, are shown by *blue* (chain B) and *green* (chain D) *helices* (A-Q, A'-Q'). The other small subunits, two HexA molecules, are shown by *red* (chain A) and *yellow* (chain C) *helices* (R-X, R'-X'). Magnesium ions are shown by *pink spheres*. The *black line* represents the non-crystallographic 2-fold axis at the center of the two heterodimers. (B) Top view of the *Ml*-HexPPs heterodimers and the topology of the subunit assembly. The topology diagram is also drawn from the top side (aspartate-rich motif side) of the heterodimer. The color codes are the same as in (A). The first and the second aspartate-rich motifs in HexB molecules, FARM (DDXX<sub>2-4</sub>D) and SARM (DDXXD) are shown by *stick* models. Inf-A (~1800 Å<sup>2</sup>) and Inf-B (~750 Å<sup>2</sup>) are the intra- and inter-heterodimeric interfaces, respectively. The *closed black circle* indicates the 2-fold axis. (C) Top view of the *Mp*-GPPs heterotetramer (*cylindrical helices*) and the topology of the subunit assembly. Two LSU molecules, the large subunits of the heterotetramer, are shown by *yellow* (chain D) and *lightgreen* (chain A) *helices*. The first and the second aspartate-rich motifs in LSU molecules, FARM (DDXX<sub>2-4</sub>D) and SARM (DDXXD) are shown by *stick* models. The other small subunits, two SSU molecules, are shown by *rightbrown* (chain C) and *magenta* (chain B) *helices*. Inf-A (~1900 Å<sup>2</sup>) and Inf-B (~800 Å<sup>2</sup>) are the intra- and inter-heterodimeric interfaces, respectively. The *closed black circle* indicates the 2-fold axis.

Supplemental Figure 3. Product analyses of the recombinant *Ml*-HexPPs using the TLC autoradiogram. Position of authentic standard (C<sub>30</sub>) (lane 1). The reaction product catalyzed by *Ml*-HexPPs sample before (lane 2) and after (lane 3) tag-removal and by HexPPs from *S. solfataricus* (33) (lane 4). Ori., origin; S.F., solvent front.

Supplemental Figure 4. Amino-acid sequence alignment of the small (A) and the large (B) components of heterodimeric *trans*-prenyltransferases. The sequences of the small components of

*Ml*-HexPPs, HepPPs from *B. subtilis* and *B. stearothermophilus* are displayed as *Ml*-HexA, *Bsu*-HepI and *Bst*-HepI', respectively, and those for the large components of *Ml*-HexPPs, HepPPs from *B. subtilis* and *B. stearothermophilus* are displayed as *Ml*-HexB, *Bsu*-HepII and *Bst*-HepII', respectively. Identical and similar amino-acid residues are highlighted by *black* and *white boxes*, respectively. Each secondary structure of HexA or HexB is shown above each sequence. Residues forming the hydrophobic cleft wall in HexA and HexB (as illustrated in Figures 4B and 4C) are highlighted in *red* and *blue* with *arrows*, respectively. The figures were prepared with the program ESPript (38).

## References

1. Chang, T. H., Hsieh, F. L., Ko, T. P., Teng, K. H., Liang, P. H., and Wang, A. H. (2010) *Plant Cell* **22**, 454-467
2. Burke, C., Klettke, K., and Croteau, R. (2004) *Arch Biochem Biophys* **422**, 52-60
3. Burke, C. C., Wildung, M. R., and Croteau, R. (1999) *Proc Natl Acad Sci U S A* **96**, 13062-13067
4. Zhang, Y. W., Li, X. Y., and Koyama, T. (2000) *Biochemistry* **39**, 12717-12722
5. Fujii, H., Koyama, T., and Ogura, K. (1982) *J Biol Chem* **257**, 14610-14612
6. Yoshida, I., Koyama, T., and Ogura, K. (1987) *Biochemistry* **26**, 6840-6845
7. Yoshida, I., Koyama, T., and Ogura, K. (1989) *Biochem Biophys Res Commun* **160**, 448-452
8. Yoshida, I., Koyama, T., and Ogura, K. (1989) *Biochim Biophys Acta* **995**, 138-143
9. Shimizu, N., Koyama, T., and Ogura, K. (1998) *J Bacteriol* **180**, 1578-1581
10. Zhang, Y. W., Li, X. Y., Sugawara, H., and Koyama, T. (1999) *Biochemistry* **38**, 14638-14643
11. Takahashi, I., Ogura, K., and Seto, S. (1980) *J Biol Chem* **255**, 4539-4543
12. Fujii, H., Koyama, T., and Ogura, K. (1983) *FEBS Lett* **161**, 257-260
13. Zhang, Y. W., Koyama, T., and Ogura, K. (1997) *J Bacteriol* **179**, 1417-1419
14. Zhang, Y. W., Koyama, T., Marecak, D. M., Prestwich, G. D., Maki, Y., and Ogura, K. (1998) *Biochemistry* **37**, 13411-13420
15. Hirooka, K., Ohnuma, S., Koike-Takeshita, A., Koyama, T., and Nishino, T. (2000) *Eur J Biochem* **267**, 4520-4528
16. Koike-Takeshita, A., Koyama, T., Obata, S., and Ogura, K. (1995) *J Biol Chem* **270**, 18396-18400
17. Saiki, R., Nagata, A., Kainou, T., Matsuda, H., and Kawamukai, M. (2005) *FEBS J* **272**, 5606-5622
18. Saiki, R., Nagata, A., Uchida, N., Kainou, T., Matsuda, H., and Kawamukai, M. (2003) *Eur J Biochem* **270**, 4113-4121
19. Burke, C., and Croteau, R. (2002) *Arch Biochem Biophys* **405**, 130-136
20. Hosfield, D. J., Zhang, Y., Dougan, D. R., Broun, A., Tari, L. W., Swanson, R. V., and Finn, J. (2004) *J Biol Chem* **279**, 8526-8529
21. Tarshis, L. C., Proteau, P. J., Kellogg, B. A., Sacchettini, J. C., and Poulter, C. D. (1996) *Proc Natl Acad Sci U S A* **93**, 15018-15023
22. Tarshis, L. C., Yan, M., Poulter, C. D., and Sacchettini, J. C. (1994) *Biochemistry* **33**, 10871-10877
23. Rondeau, J. M., Bitsch, F., Bourgier, E., Geiser, M., Hemmig, R., Kroemer, M., Lehmann, S., Ramage, P., Rieffel, S., Strauss, A., Green, J. R., and Jahnke, W. (2006) *ChemMedChem* **1**, 267-273
24. Kavanagh, K. L., Guo, K., Dunford, J. E., Wu, X., Knapp, S., Ebetino, F. H., Rogers, M. J., Russell, R. G., and Oppermann, U. (2006) *Proc Natl Acad Sci U S A* **103**, 7829-7834
25. Gabelli, S. B., McLellan, J. S., Montalvetti, A., Oldfield, E., Docampo, R., and Amzel, L. M. (2006) *Proteins* **62**, 80-88
26. Chang, T. H., Guo, R. T., Ko, T. P., Wang, A. H., and Liang, P. H. (2006) *J Biol Chem* **281**, 14991-15000
27. Kloer, D. P., Welsch, R., Beyer, P., and Schulz, G. E. (2006) *Biochemistry* **45**, 15197-15204
28. Noike, M., Katagiri, T., Nakayama, T., Koyama, T., Nishino, T., and Hemmi, H. (2008) *FEBS*

- J* **275**, 3921-3933
29. Nishio, K., Nodake, Y., Hamada, K., Suto, K., Nakagawa, N., Kuramitsu, S., and Miura, K. (2004) *Acta Crystallogr D Biol Crystallogr* **60**, 178-180
  30. Miyagi, Y., Matsumura, Y., and Sagami, H. (2007) *J Biochem* **142**, 377-381
  31. Kavanagh, K. L., Dunford, J. E., Bunkoczi, G., Russell, R. G., and Oppermann, U. (2006) *J Biol Chem* **281**, 22004-22012
  32. Sun, H. Y., Ko, T. P., Kuo, C. J., Guo, R. T., Chou, C. C., Liang, P. H., and Wang, A. H. (2005) *J Bacteriol* **187**, 8137-8148
  33. Hemmi, H., Noike, M., Nakayama, T., and Nishino, T. (2002) *Biochem Biophys Res Commun* **297**, 1096-1101
  34. Guo, R. T., Kuo, C. J., Chou, C. C., Ko, T. P., Shr, H. L., Liang, P. H., and Wang, A. H. (2004) *J Biol Chem* **279**, 4903-4912
  35. Sagami, H., and Ogura, K. (1985) *Methods Enzymol* **110**, 206-209
  36. Hirooka, K., Bamba, T., Fukusaki, E., and Kobayashi, A. (2003) *Biochem J* **370**, 679-686
  37. Lee, J. K., Her, G., Kim, S. Y., and Seo, J. H. (2004) *Biotechnol Prog* **20**, 51-56
  38. Gouet, P., Courcelle, E., Stuart, D. I., and Metoz, F. (1999) *Bioinformatics* **15**, 305-308
