# Supplementary material
Source: PubMed Central journal article supplement (PMC3030375)

# Supplemental Figure 2.

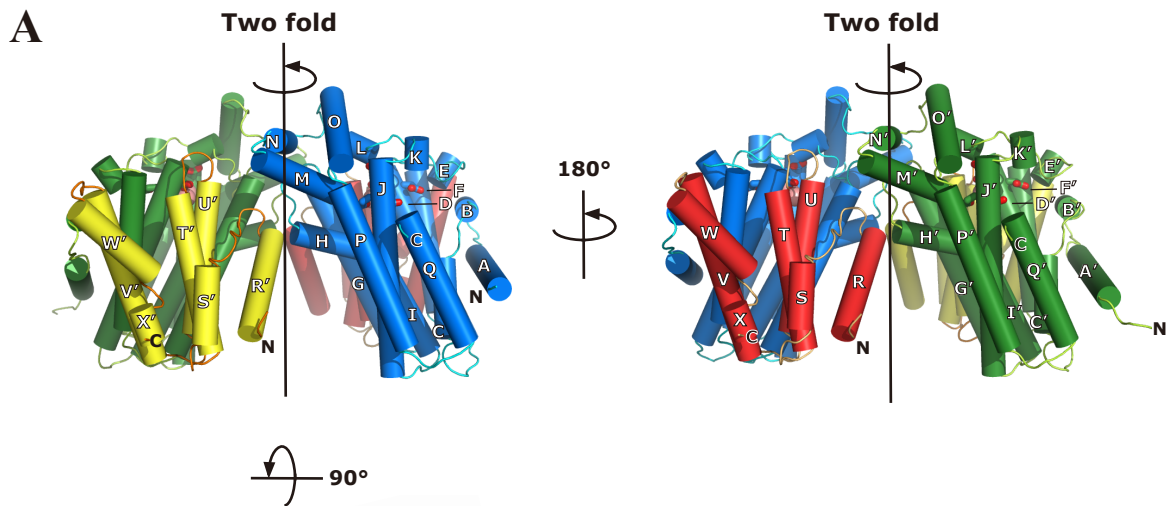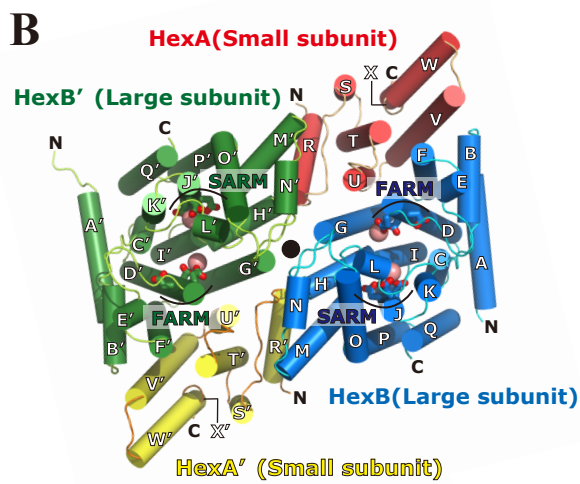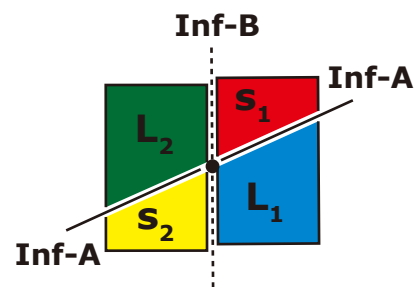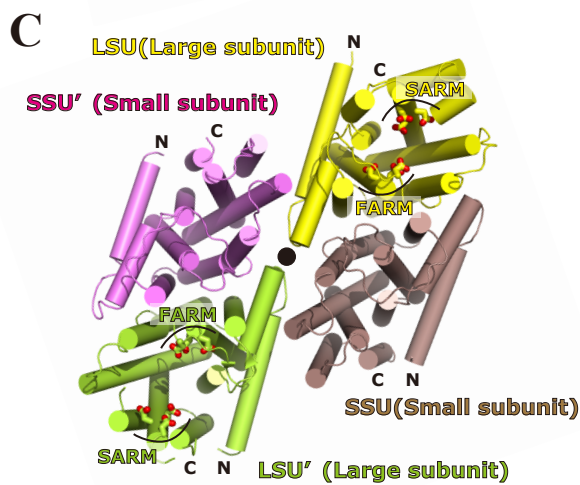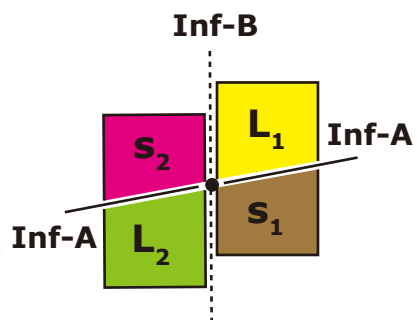

Supplement: supp_M110.147991_figure2a.pdf [file supp_M110.147991_figure2a.pdf]

# Supplemental Figure 3.

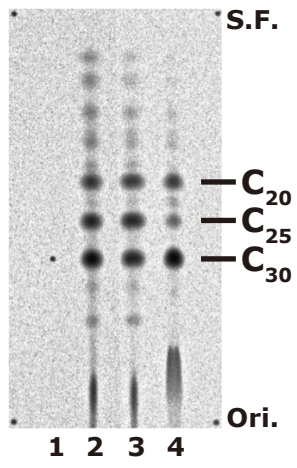

Supplement: supp_M110.147991_figure3.pdf [file supp_M110.147991_figure3.pdf]

# Supplemental Figure 4.

**A**

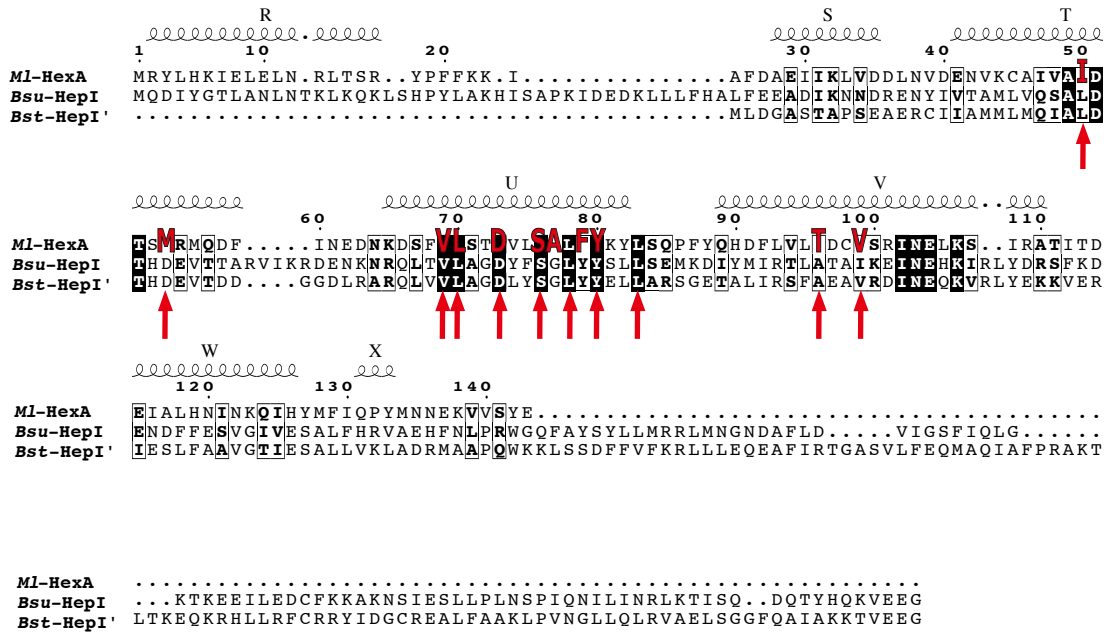

**B**

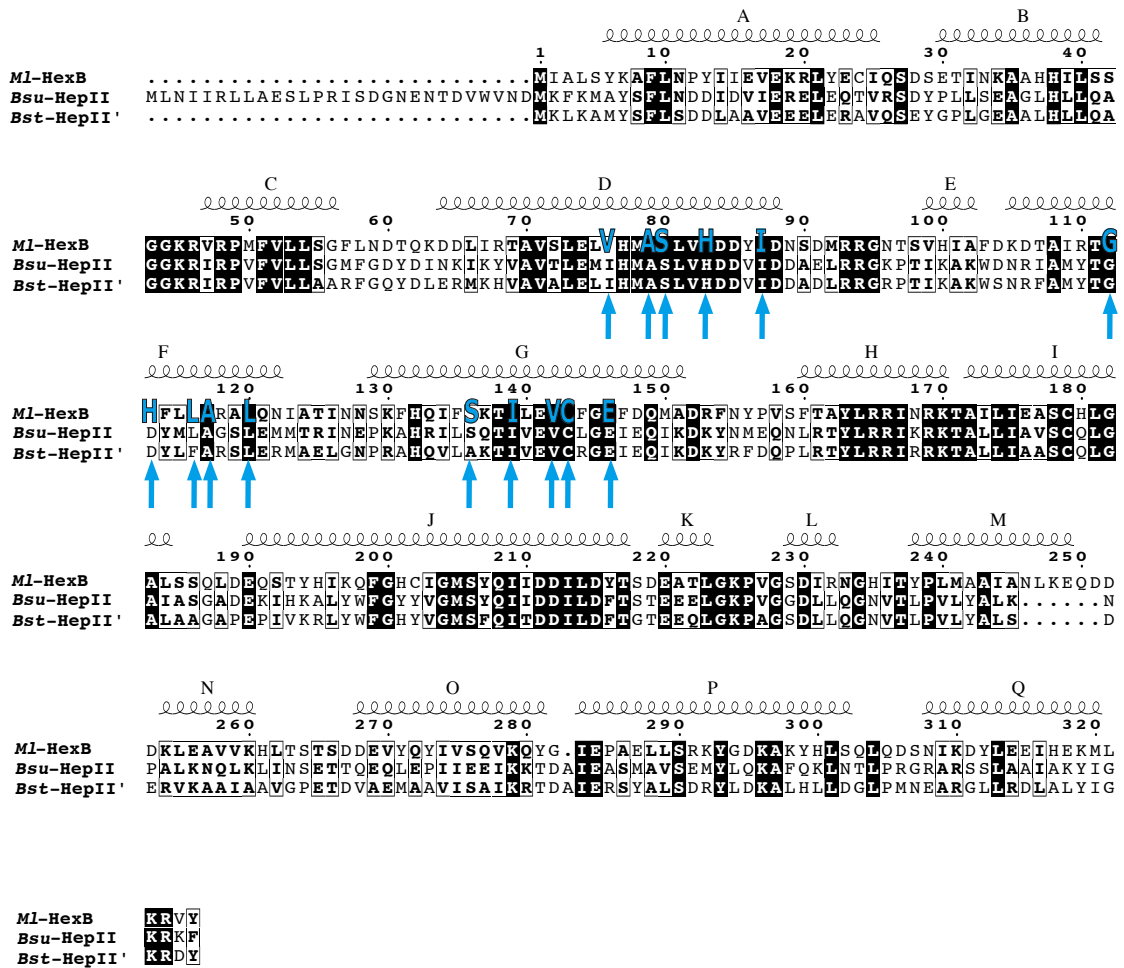

Supplement: supp_M110.147991_figure4a.pdf [file supp_M110.147991_figure4a.pdf]
